# Supplementary material for: Hormonal contraceptive exposure relates to changes in resting state functional connectivity of anterior cingulate cortex and amygdala
Source: PubMed Central journal article supplement (PMC10374315; doi:10.3389/fendo.2023.1131995), 2023-07-13
Supplement: DataSheet_1.pdf [file DataSheet_1.pdf]

## Supplementary material

### 1. Methods

#### 1.1. Participants and procedure

Subsamples distribution for each progestogenic component of HC:

HCs containing levonorgestrel ( $n_{HC}=41$ ;  $n_{NC}=14$ ), desogestrel/etonorgestrel ( $n_{HC}=8$ ;  $n_{NC}=14$ ), gestoden ( $n_{HC}=12$ ;  $n_{NC}=12$ ), norelgestromin/ norgestimate ( $n_{HC}=1$ ;  $n_{NC}=3$ ) and norethisterone ( $n_{NC}=2$ ) were included in the type *androgenic*; and HCs containing drospirenone ( $n_{HC}=15$ ;  $n_{NC}=22$ ), chlormadinone acetate ( $n_{HC}=13$ ;  $n_{NC}=12$ ), dienogest ( $n_{HC}=7$ ;  $n_{NC}=14$ ), and cyproterone acetate ( $n_{HC}=8$ ;  $n_{NC}=4$ ), were included as *anti-androgenic*.

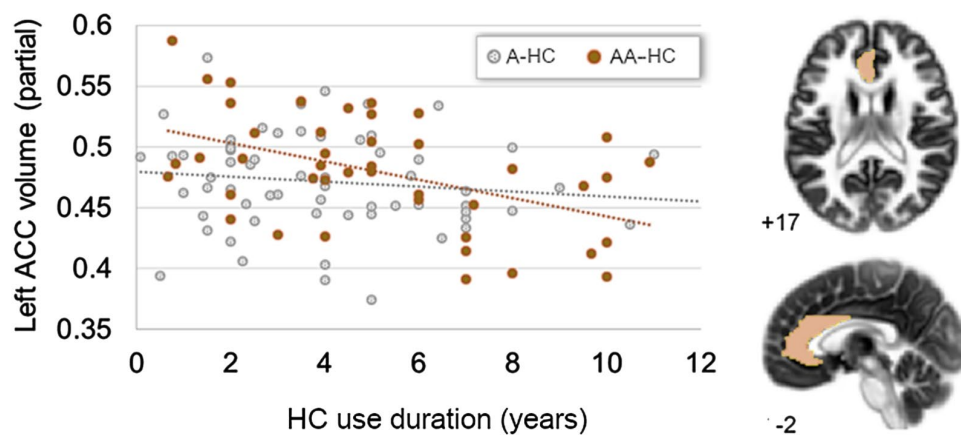

**Figure S1. Interactive effect of current HC use duration and androgenicity on the left ACC GM volume.** Current users of an anti-androgenic HC (AA- HC) showed lower GM volume in the left ACC the longer the HC use. This effect was not observed for the androgenic HC (A- HC) users. HC: hormonal contraceptive; A: androgenic; AA: anti-androgenic.

a) Left ACC HC users

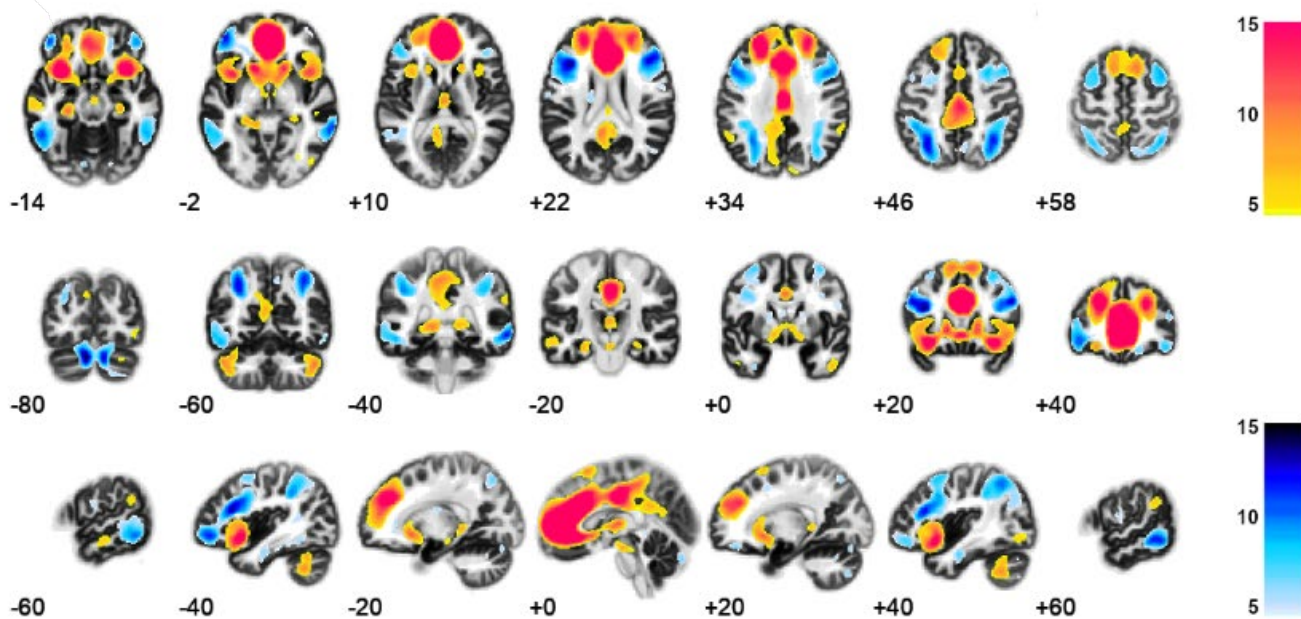

b) Right ACC HC users

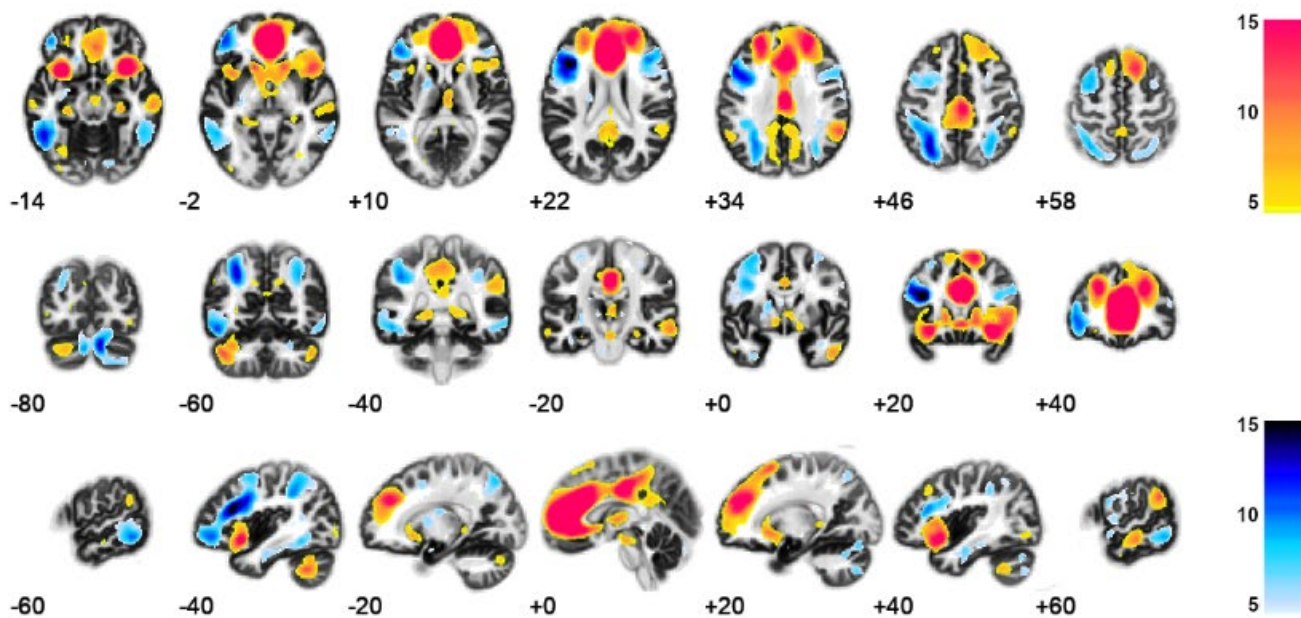

**Figure S2. Seed to whole-brain connectivity for bilateral ACC in current HC users.** Positive connectivity (in warm colours) and negative connectivity (in cold colours) from left and right ACC were in line with previous meta-analysis regarding these regions of interest. HC: hormonal contraceptive.

a)

## Left ACC NC

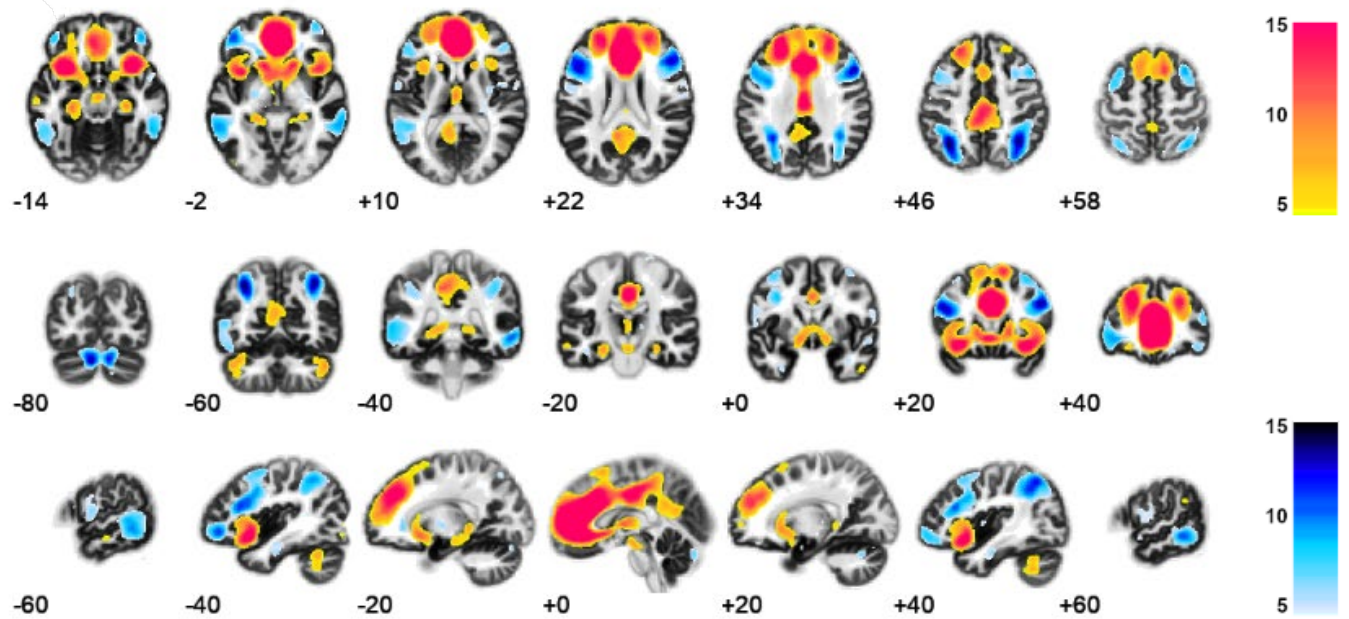

b)

## Right ACC NC

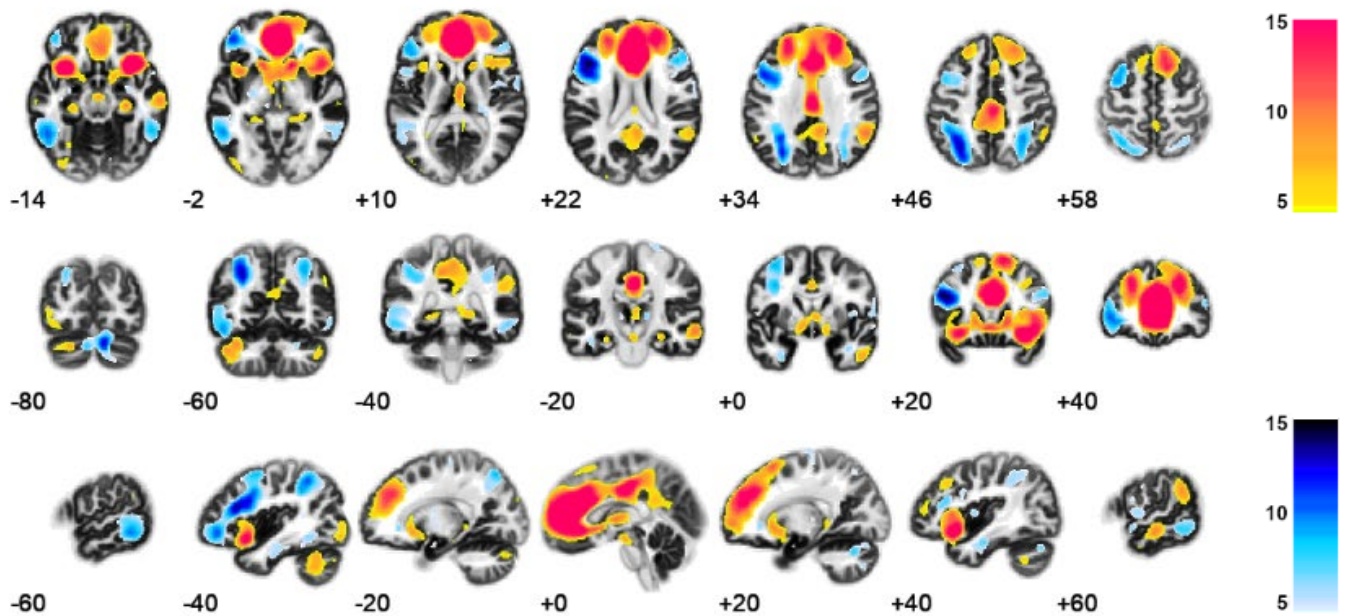

**Figure S3. Seed to whole-brain connectivity for bilateral ACC in naturally cycling (NC) previous HC users.** Positive connectivity (in warm colours) and negative connectivity (in cold colours) from left and right ACC were similar to current HC users, and in line with previous meta-analysis regarding these regions of interest.



a) Left amygdala HC users

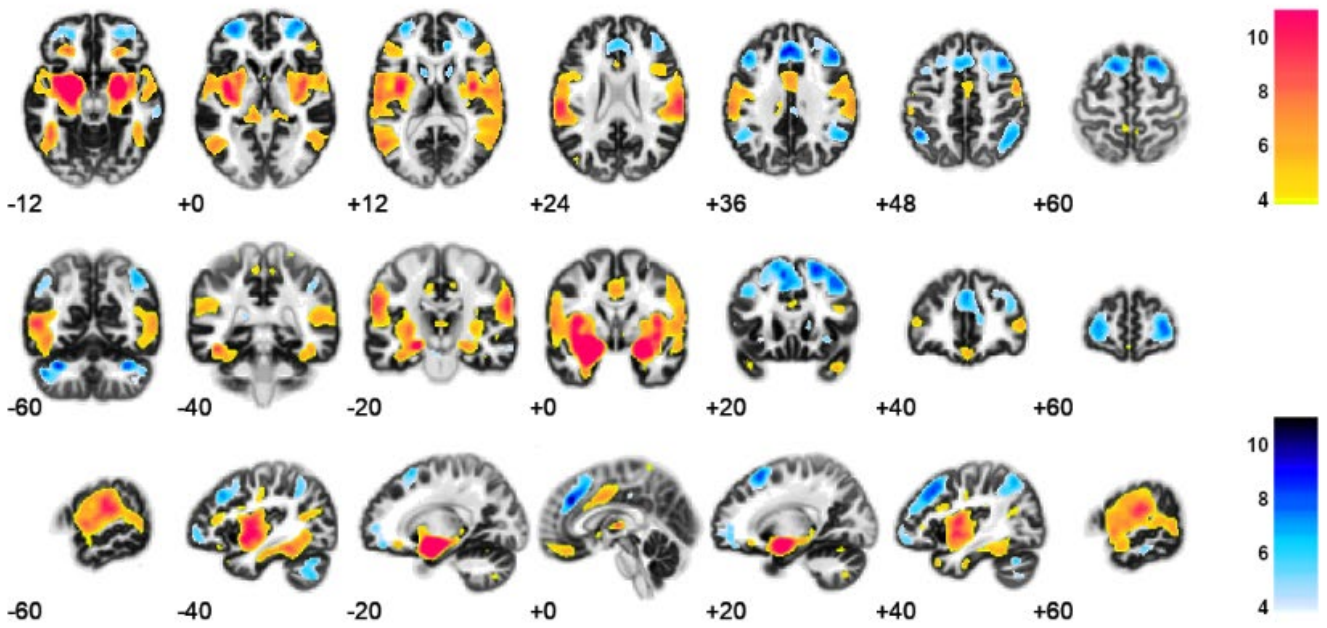

b) Right amygdala HC users

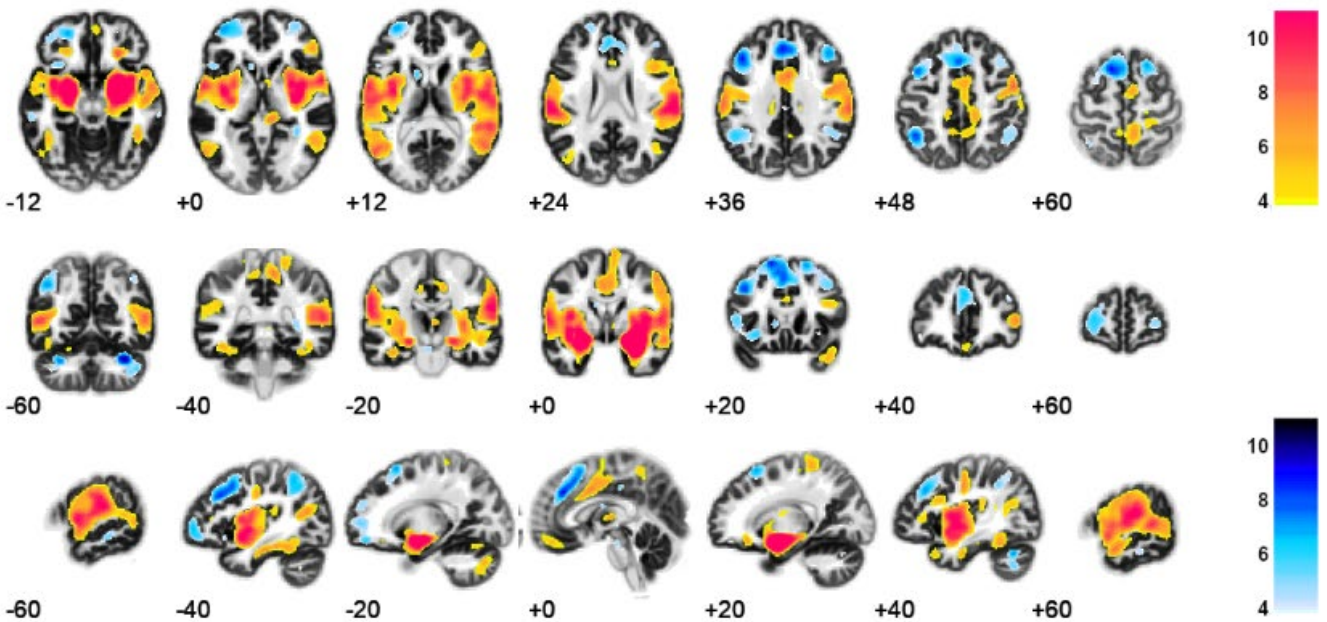

**Figure S4. Seed to whole-brain connectivity for bilateral amygdalae in current HC users.** Positive connectivity (in warm colours) and negative connectivity (in cold colours) from left and right amygdalae were in line with previous meta-analysis regarding these regions of interest. HC: hormonal contraceptive.

a)

## Left amygdala NC

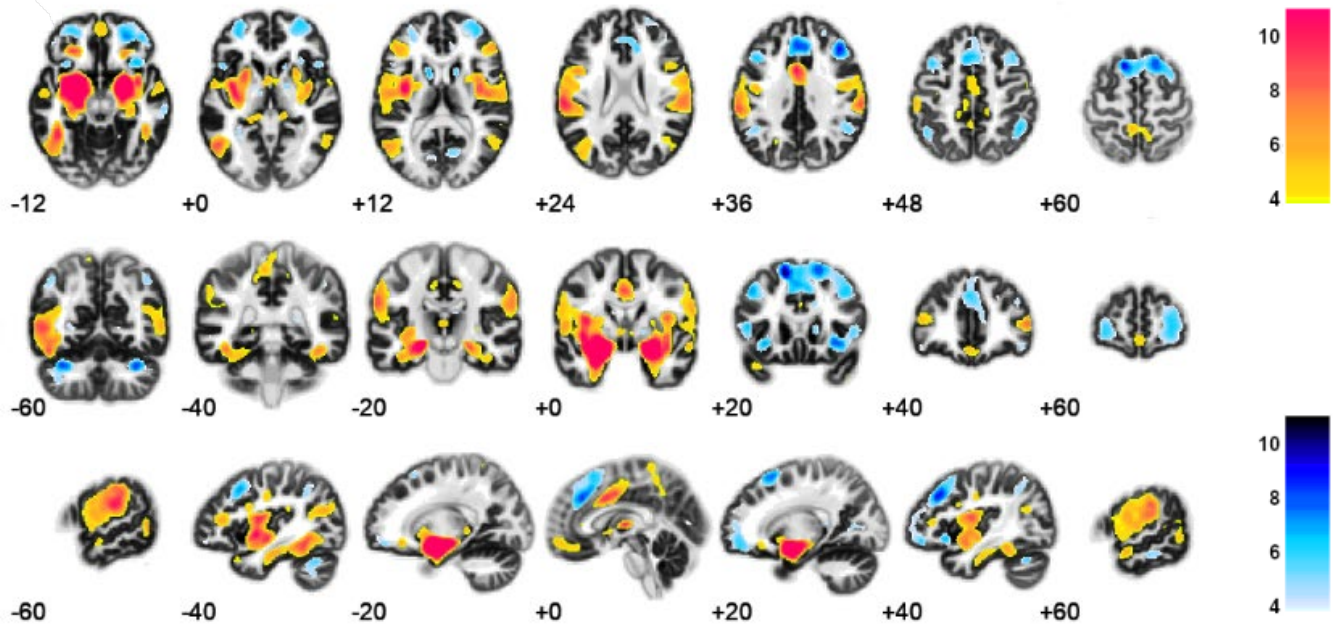

b)

## Right amygdala NC

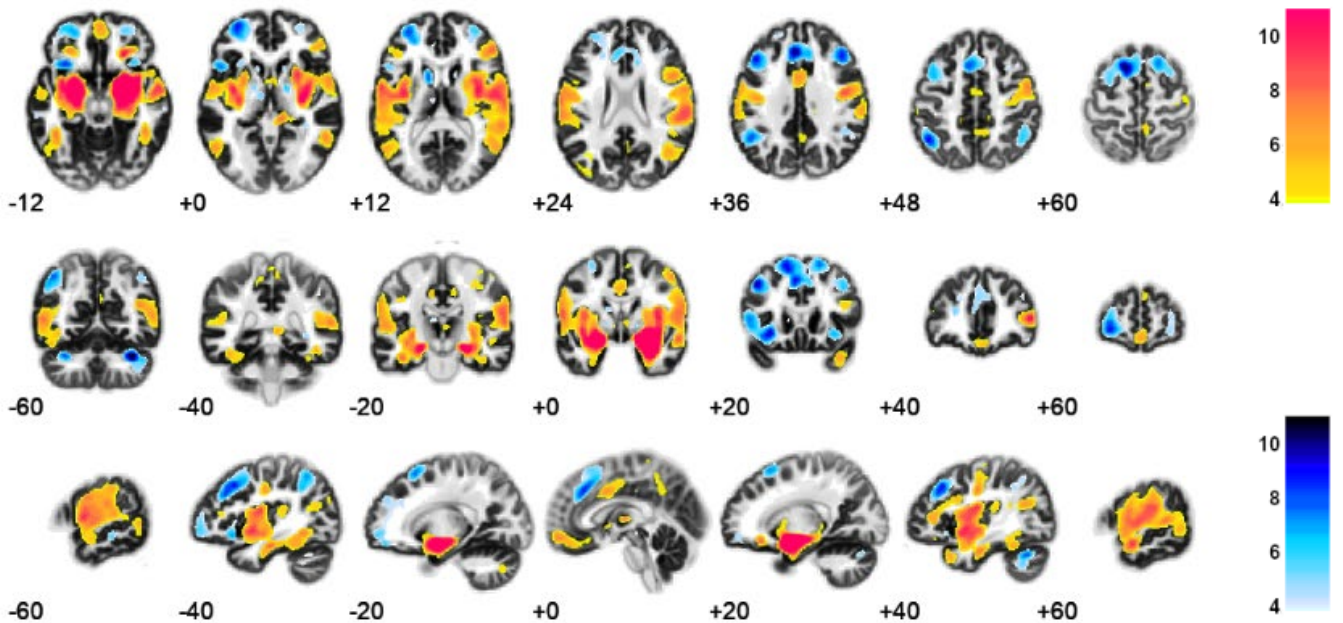

**Figure S5. Seed to whole-brain connectivity for bilateral amygdalae in current naturally cycling (NC) previous HC users.** Positive connectivity (in warm colours) and negative connectivity (in cold colours) from left and right amygdalae were similar to current HC users, and in line with previous meta-analysis regarding these regions of interest.

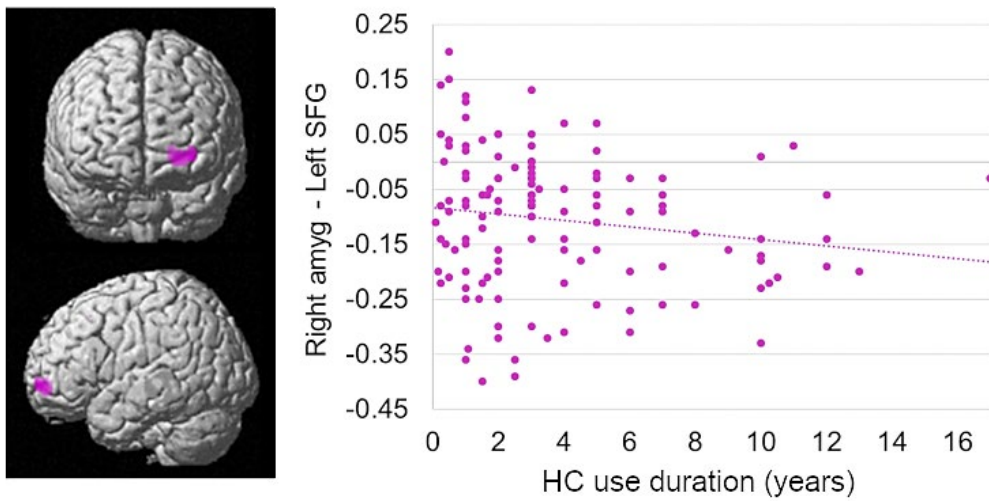

**Fig S6. Main effect of previous HC use duration on right amygdala – left SFG connectivity.** Independently of the androgenicity of the HC, previous users showed lower connectivity between right amygdala with left SFG the longer the use of the HC. HC: hormonal contraceptive.

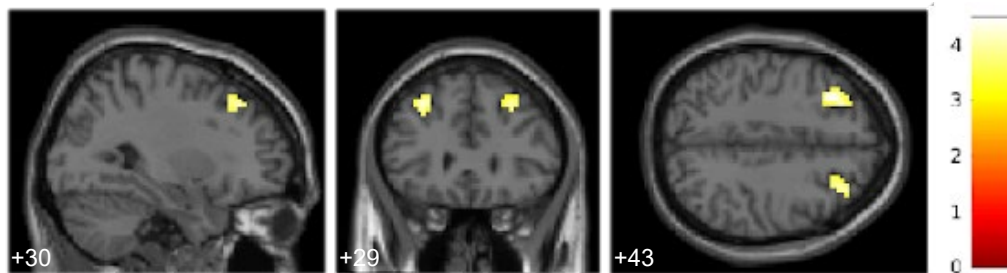

| $p_{\text{uncorrected}}$ | $p_{\text{FWE}}$ | voxels | T    | x,y,z     | Area  |
|--------------------------|------------------|--------|------|-----------|-------|
| <0.001                   | 0.042            | 37     | 4.47 | -21 56 -5 | L SFG |
| <0.001                   | 0.004            | 62     | 4.42 | -30 26 46 | L MFG |
| <0.001                   | 0.081            | 31     | 3.99 | 30 32 43  | R MFG |

**Fig S7. Main effect of current HC use duration on right amygdala – prefrontal connectivity.** Independently of the androgenicity of the HC, previous users showed lower connectivity between right amygdala with left SFG and bilateral MFG the longer the use of the HC. HC: hormonal contraceptive.
